# Supplementary material
Source: MDPI journal article supplement (https://www.mdpi.com/2073-4352/12/12/1698)
Supplement: s1 [file s1]

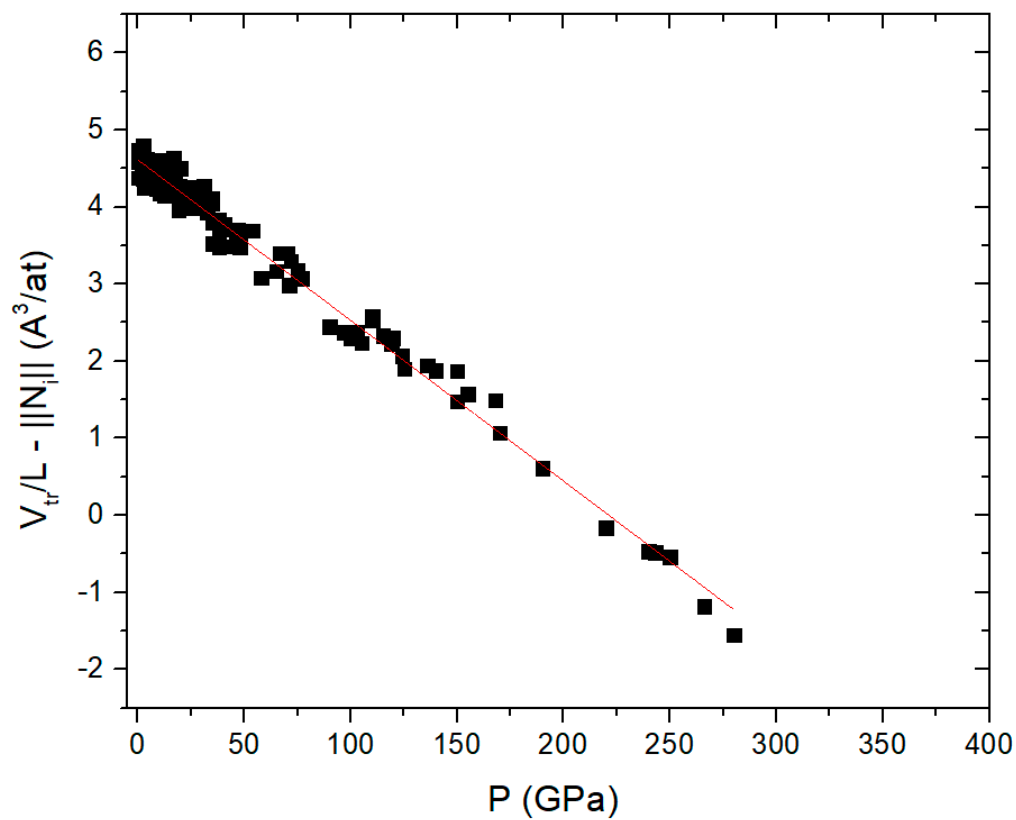

(a)

**Figure S1.** Volume of elemental polymorphs in  $\text{\AA}^3/\text{at}$  (table 1) divided by the principal quantum number  $L$  as function of pressure in GPa and mapped onto the set  $N_4$ . Within uncertainties the slope is linear and equal for all sets  $N_i$ . The adjusted  $R^2$  is 0.9985 and the linear pressure dependence is determined to  $-0.02084(26) \text{\AA}^3/(\text{at}\cdot\text{GPa}) = 1.255(16) \cdot 10^{-17} \text{ m}^3/(\text{Pa}\cdot\text{mol})$ .

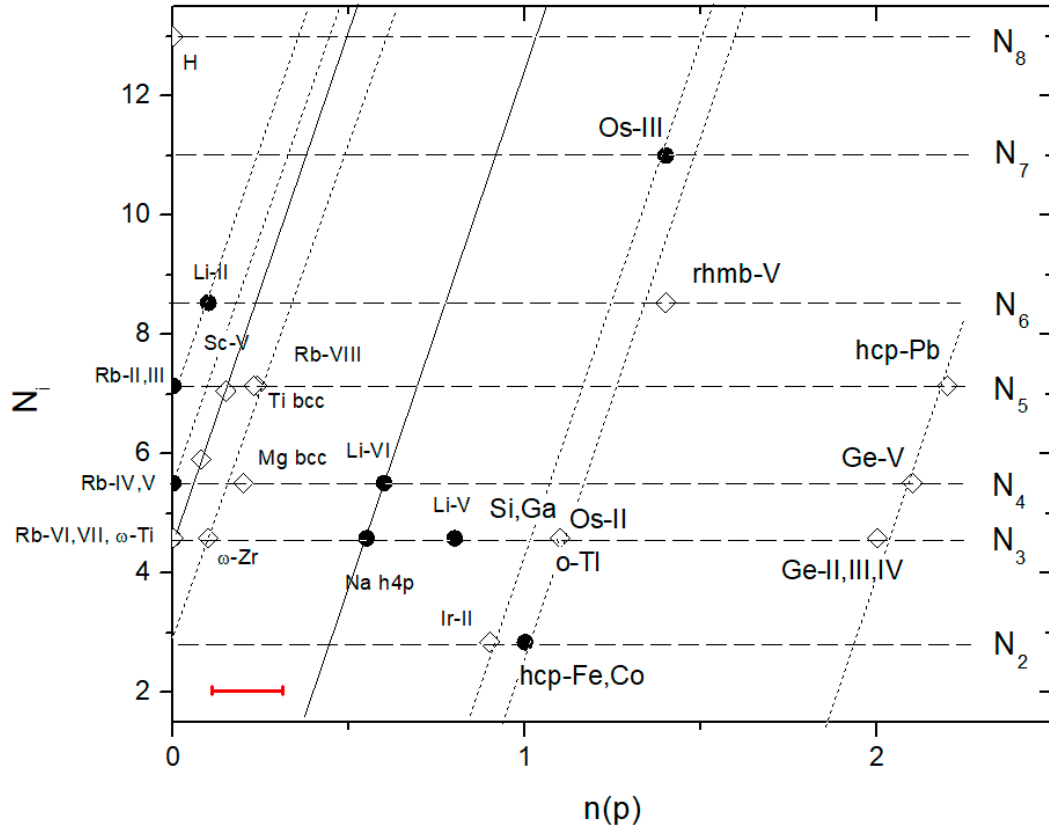

(a)

**Figure S2.** Correlation between the normalized transformation volumes from equation (1) and p-state occupancy. Reference  $P = 0$  GPa volumes  $N_i$  from equation (1) are used to define the  $V_{tr}/L$  sets of the alkaline metals and of a selection of other elements as function of p-state occupancy. Occupancies are obtained from reported measurements (refs. [10, 16, 17], circles), computational studies [2,4,14] (circles), Figure 1 (bcc-Ti, Rb-VIII, Sc-V, diamonds), or proposed here by the tentative systematics (for the polymorphs of Si, Ga, Ge, bcc-Mg, Os, Ir, and V, diamonds). Solid lines: Fitted correlation for o-Zr, bcc-Ti, and Rb-VIII and for h4p-Na and Li-VI. The same slope was applied to all data (dotted lines). Dashed lines give the values  $N_i$  as guidelines. Red bar = estimated average uncertainty.
